# Supplementary material for: Increased stress, weight gain and less exercise in relation to glycemic control in people with type 1 and type 2 diabetes during the COVID-19 pandemic
Source: PubMed Central journal article supplement — BMJ Open Diabetes Res Care. 2021 Jan 11;9(1):e002035. doi: 10.1136/bmjdrc-2020-002035 (PMC7802391; doi:10.1136/bmjdrc-2020-002035), 2021-01-11
Supplement: bmjdrc-2020-002035supp002.pdf [file bmjdrc-2020-002035supp002.pdf]

**Supplementary table 1.** Impact of the quarantine on participant's glycaemic control and insulin use, weight, exercise, and psychological stress and anxiety.

|                                           | All patients<br>(n=399) | Type 1 diabetes<br>(n=265) | Type 2 diabetes<br>(n=134) | P-value |
|-------------------------------------------|-------------------------|----------------------------|----------------------------|---------|
| Change in ability to regulate glucose (%) |                         |                            |                            | 0.03    |
| <i>Much easier</i>                        | 6.5                     | 7.9                        | 3.7                        |         |
| <i>Somewhat easier</i>                    | 13.3                    | 15.1                       | 9.7                        |         |
| <i>No change</i>                          | 49.1                    | 46.8                       | 53.7                       |         |
| <i>Somewhat more difficult</i>            | 24.1                    | 25.3                       | 21.6                       |         |
| <i>Much more difficult</i>                | 7.0                     | 4.9                        | 11.2                       |         |
| Change in insulin use (%)                 |                         |                            |                            | 0.07    |
| <i>Much less insulin</i>                  | 0.9                     | 0.4                        | 2.3                        |         |
| <i>Somewhat less insulin</i>              | 7.4                     | 8.4                        | 4.6                        |         |
| <i>No change in insulin</i>               | 64.1                    | 61.2                       | 72.7                       |         |
| <i>Somewhat more insulin</i>              | 23.9                    | 26.6                       | 15.9                       |         |
| <i>Much more insulin</i>                  | 3.7                     | 3.4                        | 4.6                        |         |
| Change in weight (%)                      |                         |                            |                            | 0.002   |
| <i>Weight loss ≥ 5 kilograms</i>          | 2.0                     | 0.4                        | 5.2                        |         |
| <i>Weight loss 3-4 kilograms</i>          | 2.5                     | 2.3                        | 3.0                        |         |
| <i>Weight loss 1-2 kilograms</i>          | 7.5                     | 6.8                        | 9.0                        |         |
| <i>No change in weight</i>                | 47.1                    | 50.2                       | 41.0                       |         |
| <i>Weight gain 1-2 kilograms</i>          | 29.6                    | 32.1                       | 24.6                       |         |
| <i>Weight gain 3-4 kilograms</i>          | 8.8                     | 6.4                        | 13.4                       |         |
| <i>Weight gain ≥ 5 kilograms</i>          | 2.5                     | 1.9                        | 3.7                        |         |
| Change in exercise (%)                    |                         |                            |                            | 0.46    |
| <i>Less exercise than before</i>          | 45.7                    | 43.4                       | 50.0                       |         |
| <i>No change in exercise</i>              | 44.5                    | 46.9                       | 40.2                       |         |
| <i>More exercise than before</i>          | 9.7                     | 9.7                        | 9.8                        |         |
| Change in stress (%)                      |                         |                            |                            | 0.35    |
| <i>Much less stress</i>                   | 7.0                     | 7.9                        | 5.2                        |         |
| <i>Somewhat less stress</i>               | 12.3                    | 14.0                       | 8.2                        |         |
| <i>No change in stress</i>                | 46.9                    | 44.5                       | 51.5                       |         |
| <i>Somewhat more stress</i>               | 27.8                    | 27.2                       | 29.1                       |         |
| <i>Much more stress</i>                   | 6.3                     | 6.4                        | 6.0                        |         |
| Change in anxiety (%)                     |                         |                            |                            | 0.60    |
| <i>Much less anxiety</i>                  | 5.3                     | 5.7                        | 4.5                        |         |
| <i>Somewhat less anxiety</i>              | 11.5                    | 12.8                       | 9.0                        |         |
| <i>No change in anxiety</i>               | 55.9                    | 54.0                       | 59.7                       |         |
| <i>Somewhat more anxiety</i>              | 24.6                    | 25.3                       | 23.1                       |         |
| <i>Much more anxiety</i>                  | 2.8                     | 2.3                        | 3.7                        |         |
| PSS total score (mean, SD) <sup>a</sup>   | 13.3 (±6.5)             | 13.7 (±6.2)                | 12.8 (±6.7)                | 0.16    |

<sup>a</sup>Perceived Stress Scale: scores  $\geq 14$  indicate moderate distress. P value for difference between T1DM and T2DM
